# Supplementary material
Source: PubMed Central journal article supplement (PMC1082852)
Supplement: pnas_102_15_5495__2.pdf [file pnas_102_15_5495__2.pdf]

*D. melanogaster* Northern probe PCR primers

| cDNA ID | cDNA length, bp | Probe length, bp | 5' probe primer          | 3' probe primer          |
|---------|-----------------|------------------|--------------------------|--------------------------|
| AT08427 | 1808            | 1000             | GGCCATAGCCTTGTACGTGT     | CCGTGAAGCTTTGCTGTGTA     |
| AT11392 | 994             | 807              | CACCCTCTGCACAGCAGATA     | ATTGTTGCCCCCAATTTGTA     |
| AT13310 | 606             | 50               | GCAATTGACCCATGCAATTT     | GCTCGGAAGAAATTTCCATCA    |
| AT14266 | 781             | 718              | GCTAAATTAAGGCGATTGTAAGG  | CCCGACACGCTGTTTCTTAT     |
| AT21289 | 1415            | 997              | GACGTCACAGCAAGGACTCA     | GCAAATGCCGTGAGGATAAT     |
| AT22150 | 1080            | 982              | AATAGGCTCGAGCAGATGGA     | GGAATACAATGCGCCCTAGA     |
| AT24650 | 578             | 507              | CGAACTCAGGACGCTCTTCT     | CGCTTGTACATTTTGCCTAAG    |
| AT27057 | 840             | 727              | AGTGAATAATCCAACCCGACT    | CCATGGGATAAGCCCTCGAAT    |
| AT28783 | 1553            | 974              | ATCGAAGACACCTTGGATGG     | GAAAGAATTGCCAGCGAGAC     |
| AT31442 | 1111            | 901              | AACATTTTCGTCGGGTTCTG     | AGCCCAATTTATCCCCTGTG     |
| GH03576 | 931             | 710              | TTGAATCGGAATCAGTGTGC     | TGAAAGTCTGAGCAAACCAA     |
| GH05108 | 1094            | 959              | GAGGATGTGGAGGATGAGGA     | CTGTTCCAAAATTGCTGTGG     |
| GH05710 | 1211            | 1037             | GGGAAACGCTGCAAAAGACTA    | GCACATGTATGGCGATTGTC     |
| GH06385 | 1190            | 948              | AACATTTTCGTCGGGTTCTG     | CAACAACGGCAACAGCTCTA     |
| GH08923 | 2462            | 1100             | GTGCGGATAATGCTTGGTTT     | CTGTTGGGGGAATTTGCTTA     |
| GH14469 | 695             | 615              | ACCACGTGTGCCATTTC        | ACGTCCACTTTTCTGGCATC     |
| GH22170 | 743             | 702              | GCGTTCACGCGACTCGTA       | TTTTGCTTTTTAGCGCTCGT     |
| GH25188 | 827             | 733              | ATGGAACCCAGAACCAAGC      | TGGGCGCCATATATTTTGAT     |
| GH25505 | 2811            | 1021             | CTACACTGCCAGCAACGAAA     | TCGATCTGATTTCCGGGTAGG    |
| GH26692 | 1674            | 923              | GCCAATTGCCGAAGAGAATA     | ACCGATTGGTAAAGCGCTAA     |
| GH26828 | 2335            | 949              | TGGCGAGTTGATGCGATTAG     | TAAAACTCCTCGAAGCGGAGA    |
| GH27201 | 4554            | 986              | TGCTGCTGTGAAAATTCCTG     | ACACCACCCAGCGAGAATAC     |
| GM01028 | 1157            | 974              | AACATTTGCATGTGTTGGGTA    | TTTTTAAGGGTTGGACAACCG    |
| GM01206 | 1214            | 977              | CGAATGCAAACAGAGAACCA     | TTTATTTCAATTCGAGGTTGG    |
| GM02923 | 1035            | 819              | CAACTATTTGCCAGCGCTTA     | AATTTCTCATACGCGTGTCA     |
| GM03003 | 1884            | 1060             | TGGAGTCAAAGCGGATAC       | GACAGCGGACGTGGCTATT      |
| GM03661 | 1159            | 947              | TCGCCACTTGTTTTAAACGA     | TTTTTGCTCAACGGGACAAT     |
| GM03914 | 1046            | 890              | CCCCTCGTCTCTACTTCCAA     | TGCAGTGATTCGGTGTGAT      |
| GM04921 | 1159            | 951              | ATCAATTTAGCCGCCTTGTG     | TTGCTGAAATGCAAAACAAA     |
| GM07040 | 3544            | 969              | TTGACGACAGGCAAACTCAG     | AAATGGGCGTAAAAGTGTGC     |
| GM07077 | 1385            | 1067             | CGCTGTTCTCATTTGCGATA     | CCAATGCGCATACATTGTTC     |
| GM07658 | 2095            | 939              | TTGCAACTGCAATAGCCAAC     | AGTTTTTGGCACCACCAAG      |
| GM07660 | 853             | 701              | ATCGAAAAGACGAGCGACAAA    | TCGTACAAAATGTTCAAACAACA  |
| GM07702 | 850             | 800              | GATGGCAAGCCAACAACAAC     | GGGTATTGTCACTTCCGGTACA   |
| GM09444 | 653             | 507              | TCCAGAGCAGACGGAAAAGT     | CTTCGGTGTGGGGTGTITTT     |
| GM09534 | 912             | 877              | CCCCTCTCGCTCTAACCTCT     | TTTCCCATTTCTCTTTATTCTCG  |
| GM09668 | 834             | 604              | TGTAGCAAAAACAAAACCATGT   | TGCTCGAATATTTGCTAGATTTTG |
| GM10787 | 1695            | 932              | ACCGGTTAGAGAGCGCATAA     | AGCGTGTCTGTTTGGTGTG      |
| GM12657 | 708             | 518              | CCAGACTCATCCCCACTCAT     | AGGGATGACAATTTGGCTTG     |
| GM24362 | 450             | 402              | AATGACGGGTTGATTGACTTG    | ACGCGGAAAATTTGTTATCTGC   |
| HL05775 | 1890            | 1033             | TGCCCTAAAGATCGAAAACG     | TCGCTTGCTATCGCTATTCA     |
| LD11130 | 1187            | 923              | AGTAACATGCGTGGCCAAAT     | CTGTTGGGGGAATTTGCTTA     |
| LD11162 | 1549            | 1057             | CGGTTCCCGAACAACCTAAA     | GTGTGCGTATCGGTTGTTTTG    |
| LD13184 | 2222            | 958              | AAGAAGGACGCTCTTGGTCA     | CCAAATGCAATGATGTCTCG     |
| LD16711 | 1672            | 1064             | ATTCATTGCGCCAAGTTTTG     | AGTTACGCCAGAGCCAGAAA     |
| LD23922 | 1721            | 924              | CTTCTCGTGAGCATCGACA      | TTCTTTTCCCTGCCCTTTTT     |
| LD28571 | 3302            | 951              | CGCCTATGCTTAGGTTACAGC    | CTAGGCGGTTAGTCCCTCT      |
| LD30889 | 1069            | 920              | AAACCAAAATCCACATGCAC     | CAGCAACACCAGCGATTAGA     |
| LD38553 | 1317            | 996              | ACGCGTACACAACACAAGGA     | ATGGCGAAAAGCTAAAAGA      |
| LP01161 | 527             | 444              | CATGGCTTCAACCATCTCATT    | TGGGCGTATGAGGGATTTTA     |
| LP03188 | 553             | 404              | GAGAGGTTCCGGGAACAGGAG    | GTTTGGTGGGTGATGGATG      |
| LP06491 | 403             | 302              | AGAGCAATCGGCATTGTTG      | TATCGGCTCAAAATCGGCTA     |
| LP11739 | 1222            | 1008             | CCTCCAGAAACTGTGCGATT     | CCGTTGCTTCACTGTGTTTT     |
| LP12023 | 313             | 243              | GAAACGAGTTTTGGCTCTGC     | AGGCGGTGGTTTGCATAAG      |
| RE21847 | 3191            | 1052             | ATTAAGCCAGGCCAACAAATG    | AACGACAACCACATCGACAA     |
| RE28911 | 1005            | 973              | AGTTGAGCCAAAGCITTTCA     | TTCTTGCAAGTTTGTGTTGC     |
| RE45760 | 758             | 615              | TTCCCTTTGTAATTCATAACATCA | GATGGACAGATCGCACGAC      |
| RE54004 | 562             | 506              | CAGTCGAAAACGGAGTGTCA     | GCGTTTTGTTGTTAGCCGTAA    |
| RE63504 | 331             | 290              | CGTCCAGACCAGAAGGAAAA     | GGAACCTTGGCGAAAATCTA     |
| RE65113 | 1062            | 959              | ATTGCTGTTCTGCCCTGTTT     | TTTGGGGAACAAGCTCTCTG     |
| RE66017 | 3461            | 912              | GCGAAACGCTTCTAGTTTTG     | TTCCGATCTTGTGACCATCA     |
| RH09485 | 518             | 420              | CAGCTCTGTGCAGCTCATT      | TTTATGCCACGACACTGAAAA    |
| RH45340 | 407             | 309              | AGGCAACTAGCAGCTCGAAT     | TCCTTCAAGGCTTGCACATA     |
| RH57193 | 981             | 861              | AGCTGATTGGAGCGGAGTT      | CTCCGAGGTGATCACAGCTT     |
| RH62702 | 2049            | 939              | TTAACCTGTGTGTGCCAAA      | TATCACTTTGCGTGCCTCTG     |
| RH62830 | 326             | 305              | CTAAAGTCTCGTCGCGTGTG     | TTTTGGATGGATGAAATACGC    |
| RH63361 | 424             | 301              | TGCATTTTCTAGTTGCCAAG     | TCGACGAGATCCTTAGGAGTG    |
| SD03144 | 3956            | 1029             | CTGGTTGTCTGACTGGCTGA     | CTGGTGCCTTCACTGCTAAA     |
| SD04448 | 2301            | 965              | TGGAGCACTTGATGAAAACG     | TTCAGCTCACACCTTCATGC     |
| SD05379 | 1391            | 1041             | GTGATGAGGTGGGAAGCAAC     | CGGTTCTACCGAGTGTGT       |
| SD10988 | 1415            | 927              | GCTTCTGTGTTTCTCTGTC      | ATGTTTTCTGCCTTGCCACT     |
| SD25037 | 1560            | 1100             | GATTCCCAGACCGAATCAGA     | AGGTGGGTGAGATCTTGTGG     |
