# Supplementary material
Source: PubMed Central journal article supplement (PMC1082852)
Supplement: pnas_102_15_5495__4.pdf [file pnas_102_15_5495__4.pdf]

***D. melanogaster* RT-PCR primers and results**

| RT-PCR product <sup>a</sup> | 5' sequencing read <sup>b</sup> | 3' sequencing read <sup>b</sup> | 5' RT-PCR primer sequence            | 3' RT-PCR primer sequence  |
|-----------------------------|---------------------------------|---------------------------------|--------------------------------------|----------------------------|
| AT11392-RA-1                | Positive                        | Positive                        | AAGCCTTCGACAAGGACTCTCGCTTC           | CACCAATCAGAGTTATCCAGAGATT  |
| AT11392-RA-2                | Negative                        | Negative                        | AATCTCTGGATAACTCTGATTGGTG            | AAATAAAGGGTATCTGATAATCGGG  |
| AT22150-RA-1                | Negative                        | Negative                        | GTCTTTGTGGAGTGGATACTCTTGT            | AATACCAACCATCTTACACTTGGA   |
| AT24650-RA-1                | Positive                        | Positive                        | ACCAGAAAGAGTGAAGACTTGT               | TCCACTTTTATATGTGCAAGTGTG   |
| AT24650-RA-2                | Positive                        | Positive                        | CTGATATGCTGCTAGTTATCTGCG             | CTACATAGCCATAACCCTGAATACG  |
| AT31442-RA-1                | Positive                        | Positive                        | GAATTAATGTGGGTCAAATTCAG <sup>c</sup> | CGTAGTGAATAGCTCGGTTGTAAT   |
| GH03576-RA-1                | Positive                        | Positive                        | CAATGTTTTGTGAGTGTGTTGAAAG            | AAGCTGAGCAAACCAATAAAGTG    |
| GH06385-RA-1                | Positive                        | Positive                        | GAATTAATGTGGGTCAAATTCAG              | TAGTTGGGACAAAAAGTTGGTTGT   |
| GH14469-RA-1                | Positive                        | Positive                        | TATGGTAACTAAAAGATGTCCGGAT            | GTTTTAGTCAGAAACATCAGTTTT   |
| GH14469-RA-2                | Positive                        | No data                         | GATGTTTCTGACTGAAAACCCGAC             | GATATCAGACGTCCTATCTAACGA   |
| GH14469-RA-3                | Positive                        | Positive                        | CTCTGACAGAAACCCCTACGTAAGAA           | TTTTACGTCACCTTTTCTGGC      |
| GM01028-RA-1                | Positive                        | Positive                        | TTTATTGGTTAGGTATTGTTCC               | GATTATCCACCCCTACCTGATTCTT  |
| GM01206-RA-1                | Negative                        | Negative                        | GATAGAACAGAGCAAAACAGAAAGC            | TGTGTGTTCCCTAATGTTTGCTTA   |
| GM07702-RA-1                | Negative                        | Negative                        | CCAACAACAATAATGTAATGAAA              | GGTACATTTAACACCTATTTGCACC  |
| GM12657-RA-1                | Negative                        | Negative                        | AAAATCTTTCACTGACAGGAAGTTG            | CGTTTGTAAATCGCTTAATGTTTT   |
| GM24362-RA-1                | Positive                        | Positive                        | GACTGCAGGAAATTTAAAAACAAA             | AAATGTTATCTGCCAAGTTTTCAA   |
| LD23922-RA-1                | Positive                        | Positive                        | ATTGAACCTGCTAACGGAAAACTTTA           | ATCTCTACTCTCCTTTCTGCCGATT  |
| LD23922-RA-2                | Positive                        | Positive                        | AATACGGCAGAAAGGAGATAGAGAT            | TTCTTGGATTCTTGGTATTCTCAG   |
| LD23922-RA-3                | Positive                        | Positive                        | CTGAGAATACCAAGAAATCCAAGAA            | TCTTCAATCAAATTCGAGTTACCAT  |
| LD23922-RA-4                | Negative                        | Negative                        | TGGTAACTCGAATTTGATTGAAGAT            | ATTTGGCGTAGTTGCACCTAATTTAT |
| LD23922-RA-5                | Positive                        | Positive                        | ATCCTGCAGACATTTATCAAGACAT            | TTTTTTTCGATTATTTGTGGCAT    |
| LD38553-RA-1                | Positive                        | Positive                        | TTAAACAATAACCCAGGAAGTGAAG            | AACAAGTTCTGTGTTTGTGTGAAA   |
| LP03188-RA-1                | Positive                        | Positive                        | CCATCAAAAACATCATCTTTGGATAC           | GATGGAGCCTTAGCTCTTAGTTCTT  |
| LP06491-RA-1                | Different splice                | Different splice                | TGGAATGGATAACTCAAAGTTGTT             | TATATGCTGATCGGTTTCCCTCAAT  |
| LP11739-RA-1                | Positive                        | Positive                        | GAAGAGGCCACAACAATACTAA               | CTGCTGTTTGCTTAAAGTCTTTTT   |
| LP11739-RA-2                | Positive                        | Positive                        | GAAAAAGACTTAAAGCAAACAGCAG            | ACTCGAGCAAATGTCATTTAAAAAG  |
| RE28911-RA-1                | Positive                        | Positive                        | GCTTTCACCAGTTAATAGCACAAA             | GGAAACATTTTACAAATACGGCATAG |
| RE28911-RA-2                | Positive                        | Positive                        | CTCTACCTCATCTATGCCGTTTGT             | TCATTCAATTTGATTGATTGATTT   |
| RE28911-RA-3                | Positive                        | Positive                        | CTACGCGTTTTAAGATGTTTAGCATT           | GGTTACCCATCAAAGTGCTCAT     |
| RE28911-RA-4                | Positive                        | Positive                        | GATCAGGATGAGCACTTTGATG               | ACATTGATTGCTGATGTTGTTCTTA  |
| RE45760-RA-1                | Positive                        | Positive                        | GTACTCAGATATTTAGCGGAAATGC            | GAGCTGGATTTGTTATACGCTACAT  |
| RE54004-RA-1                | Positive                        | Positive                        | TGTTTTGTTTTAATCCCAATAA               | TTTTTTAAGCGTTTGTGTTAGCC    |
| RE63504-RA-1                | Positive                        | Positive                        | GACCAGAAGGAAAATGAGAGCTAAG            | GACCAGAAGGAAAATGAGAGCTAAG  |
| RE63504-RA-2                | Positive                        | Positive                        | GTATGCGTAGGTTGAAGCGTAAG              | GTATGCGTAGGTTGAAGCGTAAG    |
| RE65113-RA-1                | Positive                        | Positive                        | ATAACAATAATGAATCAGTGGCGT             | GTTACAGTTGTTCTGTTGTTTATT   |
| RE66017-RA-1                | Positive, different splice      | Positive, different splice      | AGTTAACCCCAAATAAGGAAACAT             | GCAGCTATTGAATAAATCTATCGGA  |
| RH09485-RA-1                | Positive                        | Positive                        | GCTAATTAATCTTTGTTCCGCATTA            | TACTTAGGATACAGAAGCCACATC   |
| RH45340-RA-1                | Positive                        | Positive                        | AAGACCGATAGACCTCGATAGACTC            | CATTGAAGATTTTCGACAGGC      |
| RH45340-RA-2                | Positive                        | Positive                        | CTGTCGAAAATCTTCAATGGC                | TCAAGGCTTTCACACTACACATAAAA |
| RH57193-RA-1                | Positive                        | Positive                        | GAGCAGAGTAGTCTAGAGGAGCAGA            | GCAGTTAGCAGTGAGAAAATCACATA |
| RH57193-RA-2                | Negative                        | Negative                        | TATGTGATTTCTCACTGCTAACTGC            | TAAACATTTGGATTATGGATCTGGT  |
| RH57193-RA-3                | Positive                        | Positive                        | ACCAGATCCATAATCCAATGTTTA             | ACAACCTGGAGAGAGACCAGCTACTA |
| RH62830-RA-1                | Positive                        | Positive                        | GTTCTTTGAGTTCTCGACTTTATCG            | GATGAAAATACGCTTTATTGGATCAC |
| SD04448-RA-1                | Positive                        | Positive                        | AGGAAATTAATCAGAGAAAAGGGAA            | TTCTTAACCGCTAGGTGTAACAAAC  |
| SD10988-RA-1                | Positive                        | Positive                        | GCAACAGAAGCACTCAAAGAAAAT             | CTAATTAATCAATTTAGACCCCGT   |
| SD25037-RA-1                | Negative                        | Negative                        | AGCATGGAATTTTTCACTCAATAC             | ATCCCTTAGATTTCTTACACCAAC   |

<sup>a</sup> RT-PCR products are named by cDNA identifier followed by a number corresponding to the predicted intron at issue where introns are numbered ascendingly, 5' to 3'.

<sup>b</sup> RT-PCR products were sequenced using the same oligonucleotides which primed the PCR. "Positive" indicates that sequence of the RT-PCR product represents a splice junction predicted by the cDNA sequence. "Negative" indicates that a PCR representing the exon boundary in question was not amplified under the conditions we applied. "Different splice" indicates that a spliced transcript related to the curated cDNA was amplified, but that its sequence revealed a different splice junction than represented by the original cDNA.

<sup>c</sup> Unlike other primers designed for this study, this oligonucleotide necessarily spans a predicted exon boundary due to a short exon.
