# Supplementary material
Source: PubMed Central journal article supplement (PMC1082852)
Supplement: pnas_102_15_5495__5.pdf [file pnas_102_15_5495__5.pdf]

*D. pseudoobscura* orthologs of *pncr* genes

| <i>D. melanogaster</i><br>gene name | BDGP cDNA<br>identifier | <i>D. pseudoobscura</i><br>RT-PCR | Lengths of transcripts detected by Northern analysis, kb |             |             |            | <i>D. pseudo.</i><br>embryo <i>in situ</i> ° | 5' RT-PCR primer          | 3' RT-PCR primer           |
|-------------------------------------|-------------------------|-----------------------------------|----------------------------------------------------------|-------------|-------------|------------|----------------------------------------------|---------------------------|----------------------------|
|                                     |                         |                                   | Embryo                                                   | Larva       | Pupa        | Adult      |                                              |                           |                            |
| <i>pncr002:3L</i>                   | GH03576                 | Negative                          | Not tested                                               | Not tested  | Not tested  | Not tested | Not tested                                   | AAAACGGAAGCAGCGATAG       | CAAATTCTGAGCAAACGGAAA      |
| <i>pncr003:2La</i>                  | GH14469                 | Negative                          | Not tested                                               | Not tested  | Not tested  | Not tested | Not tested                                   | AAGTGAACATTTTTAAGGACTGCAC | CCTATCAAAGCTATCATCAGGAAAA  |
| <i>pncr006:3R</i>                   | LD11162                 | Positive                          | 2.0                                                      | 2.0         | 2.0         | 2.0        | Zygotic                                      | TGTCAGTGACTCTCCACACAA     | GATATACGGTCCCCCGTTT        |
| <i>pncr007:3L</i>                   | LD13184                 | Negative                          | Not tested                                               | Not tested  | Not tested  | Not tested | Not tested                                   | GAGCACTTCTGTCCGCAGTA      | GTCTCGTTTTCCAGGGCAAT       |
| <i>pncr008:3R</i>                   | LP03188                 | Positive                          | 0.7/2.0/3.5                                              | 0.7/2.0/3.5 | 0.7/2.0/3.5 | 2.0/3.5    | Zygotic                                      | AAGAGGTTGGGCACAGGAG       | TGGTAGCCTATTGTGTCTTTTG     |
| <i>pncr010:2L</i>                   | RE28911                 | Positive                          | 1.2                                                      | 1.2         | 1.2         | 1.2        | Zygotic                                      | CTTTCACCAGTTAATAGCACGAAAT | GGTCTTACTAAATACGAATGCGAAA  |
| <i>pncr011:X</i>                    | RE54004                 | Positive                          | 0.6                                                      | 0.6         | 0.6         | 0.6        | Not detected                                 | GGACTTTTGTGCAAATCATTATCG  | CGGTTTTCGGCTCTAACTTATATTT  |
| <i>pncr012:2R</i>                   | RE63504                 | Positive                          | 0.4                                                      | 0.4         | 0.4         | 0.4        | Zygotic                                      | TTGCAAGACAAGATAATAAGTGCAG | TTAAACGTGAAATTCGGAAGTGTAT  |
| <i>pncr014:X</i>                    | RH45340                 | Positive                          | 0.4                                                      | 0.4         | 0.4         | 0.4        | Zygotic                                      | GTGAAGGCGAGAACTGACC       | TCCTTCAAGTCTTGCACTACA      |
| <i>pncr015:3L</i>                   | RH57193                 | Negative                          | Not tested                                               | Not tested  | Not tested  | Not tested | Not tested                                   | GGACTAGCCAGAGGAGCTGA      | CCGTTACCTAATCGATTTCCA      |
| <i>pncr016:3L</i>                   | RH62830                 | Positive                          | Negative                                                 | 0.5         | 0.5         | 0.5        | Not detected                                 | AATTTGGTTCTTAATCTCGTCGC   | ACTTGCTTGAGCCACTCTAAGACTA  |
| <i>pncr017:3R</i>                   | RH63361                 | Positive                          | Negative                                                 | Negative    | 0.4         | 0.4        | Maternal                                     | AGGTGAGTCGAGGCGTTG        | TCACATTTTGCAGATATATTCATGTT |
