# Supplementary material
Source: PubMed Central journal article supplement (PMC1082852)
Supplement: pnas_102_15_5495__6.pdf [file pnas_102_15_5495__6.pdf]

*D. virilis* orthologs of *pncr* genes

| <i>D. melanogaster</i><br>gene name | BDGP cDNA<br>identifier | <i>D. virilis</i><br>RT-PCR | Lengths of transcripts detected by Northern analysis, kb |          |          |          | 5' RT-PCR primer      | 3' RT-PCR primer          |
|-------------------------------------|-------------------------|-----------------------------|----------------------------------------------------------|----------|----------|----------|-----------------------|---------------------------|
|                                     |                         |                             | Embryo                                                   | Larva    | Pupa     | Adult    |                       |                           |
| <i>pncr006:3R</i>                   | LD11162                 | Positive                    | 1.7                                                      | 1.7      | 1.7      | 1.7      | AGGCTAGTCAGCCGCTTAAA  | GCCATTTGTATGCCGTGTAA      |
| <i>pncr008:3R</i>                   | LP03188                 | Positive                    | 0.6                                                      | 0.6      | 0.6      | Negative | GCCAACTCCATGGGAATGTA  | TTTTGTTCAAGGGCCGAATA      |
| <i>pncr010:2L</i>                   | RE28911                 | Positive                    | 1.0                                                      | 1.0      | 1.0      | 1.0      | GGACAGTCTTGGCGTCATCT  | TGCATTTGGTGTTTGTTC        |
| <i>pncr011:X</i>                    | RE54004                 | Positive                    | 0.7                                                      | 0.7      | 0.7      | 0.7      | GCCCCAAAAGCATGACAATTT | TGCACTCACCTTGGTAACAAAA    |
| <i>pncr012:2R</i>                   | RE63504                 | Positive                    | 0.3                                                      | 0.3      | 0.3      | 0.3      | TCAGATCGTCTTCGTGACCA  | GCCGTGGTGCGTTTACTTAG      |
| <i>pncr014:X</i>                    | RH45340                 | Positive                    | 0.5                                                      | 0.5      | 0.5      | 0.5      | GTGAGTTAAGCCTGCTGCAA  | CATGGTTGTGCCATTGAAGT      |
| <i>pncr015:3L</i>                   | RH57193                 | Positive                    | Negative                                                 | Negative | 0.6      | Negative | GAGAACTGGACCCAATCGAG  | GCCTGGATGAAAAAGTGCAT      |
| <i>pncr016:3L</i>                   | RH62830                 | Positive                    | Negative                                                 | Negative | Negative | Negative | CTCGAAAGGCTGCGTGGT    | AACTGAATATTTGTGCTAAACAGGT |
| <i>pncr017:3R</i>                   | RH63361                 | Positive                    | Negative                                                 | 0.5      | 0.5      | 0.5      | GGTGGAACTGCACTTGATT   | TTTGGATTTATTTGCCGTGA      |
