# Supplementary material
Source: PubMed Central journal article supplement (PMC1082852)
Supplement: pnas_102_15_5495__7.pdf [file pnas_102_15_5495__7.pdf]

M. Musculus RT-PCR primers and results

| RT-PCR product <sup>a</sup> | RT-PCR result <sup>b</sup> | 5' primer sequence         | 3' primer sequence        |
|-----------------------------|----------------------------|----------------------------|---------------------------|
| 110008H02:3                 | Positive                   | AGCTGTGATGCTAAAAACCCTTTA   | TTTTACCTTCCAATATGTAAGCTGC |
| 110015C02:3                 | Positive                   | CTTAGTAGGACTGGAGTGCTTGG    | CTTATCATAATCTTCGCTCCTAAA  |
| 110019D14:2                 | Positive                   | GTTTTTGGTAGCCAGGATTTAACA   | CTTCCCTTCTGTAGTTCCTTC     |
| 110056G13:1                 | Positive                   | AAAGAAGGTTTTGATTGGCTAACTT  | AAAGTATGACAAAAACCAACCCAAA |
| 150002G14:1                 | Positive                   | GATGTAGACTAGGTGAGCTCTGCTG  | GTCGTAGGCTACATAGGAGGTCAT  |
| 170008B19:1                 | Positive                   | CTATAGGGTCTGCTGATCGGT      | AGCTGACAGTGAACACACTCTTG   |
| 170008K24:2                 | Positive                   | TGTTTCTGCTCTAACCCAGAAAG    | ATCAAAGTACACAAAAAGGGGAG   |
| 170013D24:2                 | Positive                   | TAAGTAGAAGATGAACCATCTGGG   | TAATGATGAGAATGTGAGAAGCACC |
| 170013G23:1                 | Positive                   | TAGTTCACATGACAGAGAGGTC     | TCGTCACCTTTCATCCACAGTAGTA |
| 170014L14:1                 | Positive                   | GTCTCAGTTGGCACTCTGGAA      | CGTTCGTGCTAAACCAAGTTAAT   |
| 170017J07:1                 | Positive                   | ATGGTACAGTTAGCCATAGACCTCA  | AATATGTTTTTTCGGTTGTAGCA   |
| 170017L05:1                 | Positive                   | GTTTGTACAGCGAAAGGATACAGAT  | ATTAGTTGTTCTGGTCTCTTTCAT  |
| 170022N22:1                 | Positive                   | TACCCCTACTCTTCCCTGAGATT    | AAGCTGTCCAAGAAITTTCTGTATG |
| 170024M18:1                 | Positive                   | TAATAGTGGCCGACACATAGGTC    | TATCTTAGAAGAGCTGAGACCCA   |
| 170024O10:3                 | Positive                   | AGTGCTTAGGAGACAATGGTGATAC  | GCTTTGTCATAAAGCTGTGTTATT  |
| 1700109S12:2                | Positive                   | GACATTTGAAGGCTACTGTGTACT   | TTTTTATTGTTGATGTGTGCGTG   |
| 1700120C14:2                | Positive                   | CAAGGTAGAGTTATTTGGGGAAG    | TTTTATTATTATTTGGATCGCAGG  |
| 1700122G02:1                | Positive                   | CCAGAGCTTGACCATCATCAG      | TCCTCTGTTGGGATTTAAGTAGC   |
| 1700125L13:1                | Positive                   | ACAGGAAGCTGTATGTAAGCTGGAG  | GGTAGGTTGAAGACTGACTTGTCT  |
| 181006J02:2                 | Negative                   | GCCACAATCCTATTATCTTACAGT   | TGACTTCCAAGCCAAAGTTATAG   |
| 181001K16:2                 | Positive                   | AGCGATATATTCTGAGGCTTTAAT   | CAGAAGCCATGAGGAATACAGATT  |
| 1810019D2:1                 | Positive                   | GCTTGAGGTTAATGGAAGTTACAAA  | CTAATTACAGCTGAGTAGGTTGGAA |
| 1810021B22:3                | Positive                   | CTTCTGATGAACATAAATGCATCCT  | ATTTAATTGGAGGATTGGCTGAGT  |
| 181004D09:1                 | Negative                   | CCAATAGATGAACATGTGTGAAAAA  | CATCCAAACAGTAGTTAATGTCCC  |
| 181004K17:1                 | Positive                   | ATAGCTCCACAGCTGAAGATTAGA   | CCTTCAAATAATTATCAAGGCTCA  |
| 181004T16:4                 | Positive                   | CTTTGAAGATGTGCTGCTTAAAT    | GTATCGTCAATATTTTCGGTTTIG  |
| 1810073O08:1                | Positive                   | AAGGTGTTCTGAGTTTATGACAGG   | TCTGCAGACTCTTGAACCTCCTTT  |
| 2010001A14:3                | Positive                   | GGAATGTAGTGAATCACCCTTCTA   | GAACAGTTCATAGTGGTAGGGAAGA |
| 2210039B01:3                | Positive                   | ATCTTGGCAAATAACCTCAACAAG   | ATGTTGGCTGTTACTAAGGATTCAC |
| 2210040K04:2                | Positive                   | AGTAGTCTTCTGAGTGGCAAGCTTTA | ATGTTAAGCAAACCTACCAACTGAG |
| 2210417A02:1                | Positive                   | ACAGAAGCTTGTGAAACATGAAC    | TACTCCAGCCATATCTTCAAATC   |
| 2210417K05:1                | Positive                   | AGCCAGAGCAGGAGAAATGAC      | TAGAACCCTGGAGATAGGAAGTGTG |
| 2310005L22:3                | Positive                   | GAGCTTATTTCTTGAAGAGTCTGA   | TAAGCTTACCACCAAGTGTAGACC  |
| 2310026J05:1                | Positive                   | AAACTACGGTGAAGTGTGAAGATG   | AAGGAGACAGTATCGTTTATTCAG  |
| 2310040G24:1                | Positive                   | CTAAGAATAAACTGGAAGCGTGAG   | AACCAGTGTGGTCTATCAAGTTC   |
| 2310043L19:2                | Positive                   | TTTGTATAGGACTAAGGAAGTGGCA  | ACAGATGAAAAATGAGGTTCAGAG  |
| 2310047D07:1                | Positive                   | CTGACAGATAGGACTGCATGAAAG   | ATTTAGAAGCTTCCACCTTCTC    |
| 2410004N09:2                | Positive                   | CTTACGGATATTTCTGAAACACAC   | AAAAATTAATCACTCGTCTCTG    |
| 2500002B13:1                | Positive                   | AGATGTAGAAGCTCAGCTCCTCCT   | AATCCATAGCAATTTCTACACA    |
| 2610002F03:3                | Positive                   | GACTAAAGTCTGCTATGCCAAATG   | TTATCACCACCACTCAATATCT    |
| 2610019E17:1                | Positive                   | TCTAGGTTTGTAGGAACGTTTIG    | ATTGCTAAGAACTCAGATACACGG  |
| 2610203C20-RA5              | Positive                   | TGGAGAGACAATGCTCTTCTAATCT  | CTCCTGGAAGCTCGCAACTAT     |
| 2700023E23:2                | Positive                   | CTGCTGCCTCGGACACAAG        | CTAATCTAAGTGAATACAGGCA    |
| 2700081L22:1                | Positive                   | TCCTCTGAGGCTTCATTTTCTACTA  | AGTACTTCTTTGTGATCAGTTGG   |
| 2810026P18:4                | Positive                   | AGTGACACAAGAACTGCGAGAGAT   | TTTCAATACCTCCCATTTTATTTCA |
| 2810029C07:1                | Positive                   | CTGTTTGAACAAATGACTTTTCTT   | TCTGATTAGGCTAACTGGGTGTC   |
| 2810405K22-RA5              | Positive                   | CCATGAAACGATATCCAGATTTTAC  | AAGAAGCTGGAATAACTCAGCCTTT |
| 2810482I07:1                | Positive                   | AGAGCAGGCGGATTTCT          | TATGAGCTCAGGTTGGCCTTATAC  |
| 311005K07:1                 | Positive                   | ATGACAACCCAAAGTATCACAGAG   | AATTAACTTTGAATGAGTCCACAGC |
| 4631405K08:1                | Positive                   | AAAGTATATTTTGCATCAAAAGCA   | AGCACACTTCTTCTGATTTGTACC  |
| 473248D21:2                 | Positive                   | TAGTTTGGATTTGCTTTTCTGAGTA  | TTCTGTGCTCTTTAGCAGGACT    |
| 4930405A21:3                | Positive                   | TCTTGGACTAAGCCTCTGAAACTAA  | TTTTCCAATCCTCCTTAAGAGTTT  |
| 4930412C18:2                | Negative                   | GAGAAGAACCTGACAACTCACCT    | CTTGACTACTTGTCTCTTCTCAG   |
| 4930429F24:2                | Positive                   | AGGAATGGAGAAAAGAACTAAAA    | AAGTGTGAGCTGTGATGAGAGACT  |
| 4930471C04:3                | Positive                   | TAAACAGTTCACTATGGACGTGAGA  | TCATAGCTGCAACCTTCTAATTC   |
| 4930471G24:1                | Positive                   | CTTCTGGTTTGTCTCACCAATAACT  | GTGGCTTTTCAGTTTATTTACTCTA |
| 4930503N14:2                | Positive                   | AGAAATATACTATGACCCGAAAGGG  | AGTGAAGCAATAAAGCCTAGATTGA |
| 4930539J05:1                | Negative                   | CACCAAGTTAGATGTAAATGCCC    | TTTGTAAACTTGTAGATTAGGGC   |
| 4930545O22:1                | Positive                   | ATTTCTGCTGTAAGAAAGACGAG    | ACTGGAGAACACATGTAAACAGT   |
| 4930547M16:1                | Positive                   | GAACTCAATAGGTGAGTTTCC      | TTCTGATTTCTCAGTGTCTCTGTG  |
| 4930557O15:1                | Positive                   | AGCTATCAGTGGTTTACTCATCC    | CATTGCCAATGAAACTTCTTTTA   |
| 4930565A17:2                | Positive                   | AAGGTGATCTGGTCAACTACAAG    | CAGACATCTTTTACTCCTCCCAA   |
| 4930567K20:2                | Positive                   | CCAGATACCTACGTCAAGAAACACT  | TTAGATCATCTTTTCTCTGAGC    |
| 4930570G05:1                | Positive                   | CTTTATCACAATGCTGATTTCTCC   | GAAAGCAGTTAGAAAGAGACCAAG  |
| 4930579D07:1                | Positive                   | TATTTGGATTTATTTGCTTTCA     | GACTTCGATCAAGAAATCTACTGT  |
| 4930584L06:3                | Positive                   | ACCATATTTATTTGCTGATGATGCT  | TGCTGATAATCCATTTTGTATTT   |
| 4930584N09:2                | Positive                   | GTCTGAAAGTAACTGCTTTGTCC    | AGTCAAGTAAAGTTTTTCTGCTG   |
| 4933412E12:3                | Positive                   | AGTCTTCCAGATAAGCGGATACT    | ACACAAAACTACAGCCACTTTTC   |
| 4933412O06:2                | Positive                   | TATTAGGTATGCATGTTCCACTGA   | TAGTCTTCAAGCATGACTCATTGAG |
| 4933415P20:1                | Positive                   | TGTATCTGTTCACTGCTTCTCTG    | CTTTGCTCTTACTGAGCACTTC    |
| 4933417N07-RA2              | Negative                   | AGTTCGTTTACCTTCCCTCAG      | TACTGGCAGGTATATTACAGCAACA |
| 4933421O10:1                | Positive                   | TAATAAAAGCATAAATGGGACAG    | ACCCAGTAAACAGTCAAGCAATAG  |
| 4933431G14:2                | Negative                   | CCTGGTACTGAAGACCAATG       | GGGTTATTAAAGATGCCCAAGATA  |
| 4933433G08:1                | Positive                   | GTGCTGCTCCTCTCTGTTTCT      | TTTGGAAATAATTTGACTTCCATT  |
| 5031434O11:3                | Positive                   | GAATTCATCACTGAGCCACTACTC   | TTGTTTCACTAGACCCAAATCTAGC |
| 5330411J11:2                | Positive                   | GACACATCTATAGCTCATCTCCAG   | TTCTTTCTCTGGGTTCTTCTAT    |
| 5430400D12:1                | Negative                   | CTGTAGAAGCCAGGAGCAC        | TAAGTCTGTTTTCTTCAAAGTGT   |
| 5430427G11-RA5              | Positive                   | TTTAGCAATGAGAAAGAAITTTTGG  | TGTAATAAATGTCTGTATCTGGG   |
| 5930412G12:5                | Positive                   | TATATCTATCTGCGCATGTGTATGG  | AGTCACACACAGCGGTAATAACT   |
| 6720462P11-RA5              | Negative                   | AACTCAACTCTTAATGTGTTGGC    | CCACTATACAGCGGGACACTTA    |
| 6820401H22:3                | Negative                   | GGGATATCCTAACGATCCCTACTA   | TACAATCTGTTACATGGCTCACAGT |
| 9130204G15:2                | Negative                   | GTCTGTTAATGAGGAATCAGCCT    | AAAAACATACAGACTCTGTCACACA |
| 9230111L11:6                | Positive                   | GGATGGACTAGAGGCTGTACCTTA   | GAATACCTTTTCTTCTCTTGG     |
| 9330181H18:1                | Positive                   | GCAGAGTCACTTCTGACTGAGTA    | ATTTAGGATAAAGTGGTGGAGAC   |
| 9530007G09:2                | Negative                   | TGAAGCTGAAGAGAATTGAAGAAGT  | AACTGAAACCCAGAGACATAAAGTG |
| 9630013A20:5                | Positive                   | CATGATTTGCTAGATTAACCTGGG   | GGATGCAGATATGGTATATGGTAGC |
| 9630027L18:4                | Positive                   | CTGAACCATCTCATGGTCAATTAAGT | AGTCCACTTTTGTGTTTGGAGAC   |
| 9830169G21:1                | Positive                   | AAGACAAAGGCACCACTTCAAT     | CTAAAGCAGAAAGAAAGGACACTG  |
| A130096F13:2                | Positive                   | CTGGTCTTTTCAACGATTAATTT    | GCAITTTATTTTAAACCAAGCTGA  |
| A230053I05:1                | Positive                   | AGAACAGAGGCTGGCATAAATAAG   | GTATATACACTGCCATCAGTCAGC  |
| A230059N19:1                | Positive                   | AGTTAGAAGAGAGGCTCAGTCTCC   | AAAGTGGTTGCTGCATTTATTTAG  |
| A330042M09:2                | Positive                   | AGATCCCTCTGCTATGTTAAATCT   | GACCAAAATCTCAGTCTTATTG    |
| A430014K01:2                | Positive                   | GGAAAGACCATTCATCAACAATAAG  | CCCTTACTATATCGTGAAATTTG   |
| A430106F14:1                | Positive                   | CTGGAGATACCAAGAGCAAGTAAG   | ATGAAGTGCAGACTTAACAGCAAGT |
| A530029P05:1                | Positive                   | GAAGTATTGCAAAATTAATCCCG    | ATGGAAATATTGTACGCTGTTGT   |
| A530032E18:4                | Positive                   | ACAGAACTCTCTGGCTGTTCTTTA   | CAAAAGATCAAGGCATTAAGAAA   |

<sup>a</sup> RT-PCR products are named by RIKEN identifier followed by a number corresponding to the predicted intron at issue where introns are numbered ascendingly, 5' to 3'.

<sup>b</sup> "Positive" indicates that a RT-PCR reaction product of the predicted length was observed on an agarose gel. "Negative" indicates that a RT-PCR product of the expected size was not detected.
