# Supplementary material
Source: PubMed Central journal article supplement (PMC1082852)
Supplement: pnas_102_15_5495__8.pdf [file pnas_102_15_5495__8.pdf]

Summary of results for mouse Northern of RIKEN ncRNAs

| RIKEN # | Tissue corresponding to probe PCR template | Predicted transcript sizes (kb) | Observed transcript Lengths (kb)       | Tissue exhibiting transcript expression                                                 |
|---------|--------------------------------------------|---------------------------------|----------------------------------------|-----------------------------------------------------------------------------------------|
| TF24887 | Brain                                      | 2.3                             | 2.0, 4.8                               | All                                                                                     |
| TF26269 | Brain                                      | 1                               | 1.1, 1.6, 5.0                          | Brain, testes, ovary                                                                    |
| TF14562 | Embryo                                     | 0.4                             | 0.5, 2.0, 2.2                          | All                                                                                     |
| TF16710 | Embryo                                     | 1.5                             | 1.9, 2.1, 5.0                          | All                                                                                     |
| TF11199 | Liver                                      | 1.2                             | 1.3, 1.9, 3.8, 3.9                     | Liver, kidney, lung, ovary; weaker in embryo, thymus, testes                            |
| TF17015 | Liver                                      | 0.5                             | 4.0, 5.9 (both brain only)<br>0.7, 1.8 | Brain for 4.0, 5.9 liver, testes; weaker in spleen, kidney, embryo for 0.7; all for 1.8 |
| TF24951 | Brain                                      | 1.7                             | 3.9, 4.1<br>1.9                        | Heart (weak ovary) for 3.9, 4.1; brain for 1.9                                          |
| TF25220 | Brain                                      | 3.3                             | 2.5, 4.0                               | Spleen, lung (4.0 only); weak in embryo, heart                                          |
