# Supplementary material
Source: PubMed Central journal article supplement (PMC1082852)
Supplement: pnas_102_15_5495__9.pdf [file pnas_102_15_5495__9.pdf]

Table 3 Features of candidate noncoding transcripts

| Curation                          |                                   |             | Data supporting expression   |                                    |                                  | Likelihood of translation |           |                                        |                                                |                                        |                              |                           |                             |
|-----------------------------------|-----------------------------------|-------------|------------------------------|------------------------------------|----------------------------------|---------------------------|-----------|----------------------------------------|------------------------------------------------|----------------------------------------|------------------------------|---------------------------|-----------------------------|
| BDGP cDNA identifier <sup>a</sup> | Genomic coordinates               | cDNA length | Predicted exons <sup>b</sup> | Overlapping ESTs, all <sup>c</sup> | Overlapping 5' ESTs <sup>d</sup> | ORF length <sup>e</sup>   |           | Non-met. init. ORF length <sup>f</sup> | D.pse. seq. ortho- logous to cDNA <sup>g</sup> | Conservation of ORF > UTR <sup>h</sup> | Ka/Ks D.pseudo. <sup>k</sup> | Ka/Ks D.vir. <sup>m</sup> | QRNA <sup>n</sup> D.pseudo. |
|                                   |                                   |             |                              |                                    |                                  | 88aa                      | 148aa (F) |                                        |                                                |                                        |                              |                           |                             |
| AT08427                           | 2R:620173-622359                  | 1808nt      | 1                            | 1                                  | 1                                | 88aa                      | 148aa (F) | 81aa                                   | +                                              | -                                      | No tblastn                   | No tblastn                | O216                        |
| AT11392                           | 2L:21925676-21924570              | 994         | 3                            | 1                                  | 1                                | 70                        | 86 (E)    | 54                                     | -                                              | -                                      | No tblastn                   | No tblastn                | No nt align                 |
| AT13310                           | U:2638514-2637929                 | 606         | 1                            | 1                                  | 1                                | 94                        | 102 (S)   | 42                                     | +                                              | +                                      | No tblastn                   | No tblastn                | No nt align                 |
| AT14266                           | 3R:23184952-23184092              | 781         | 1                            | 1                                  | 1                                | 56                        | 103 (S)   | 56                                     | +                                              | -                                      | No tblastn                   | No tblastn                | P123 O381                   |
| AT21289                           | 2L:6537649-6536219                | 1415        | 1                            | 1                                  | 1                                | 52                        | 81 (V)    | 59                                     | +                                              | -                                      | No tblastn                   | No tblastn                | O685                        |
| AT22150                           | 2L:19888725-19889711              | 1080        | 2                            | 3                                  | 1                                | 94                        | 167 (O)   | 64                                     | -                                              | -                                      | No tblastn                   | No tblastn                | No nt align                 |
| AT24650                           | 3L:6192910-6191994                | 578         | 3                            | 1                                  | 1                                | 77                        | 99 (R)    | 37                                     | -                                              | -                                      | No tblastn                   | No tblastn                | No nt align                 |
| AT27057                           | 3L:15558215-15559242              | 840         | 1                            | 9                                  | 9                                | 74                        | 125 (A)   | 50                                     | +                                              | -                                      | 0.0667                       | 0.0822                    | P522                        |
| AT28783                           | 3L:593397-591836                  | 1553        | 1                            | 1                                  | 1                                | 84                        | 111 (T)   | 51                                     | +                                              | -                                      | No tblastn                   | No tblastn                | O199                        |
| AT31442                           | 3L:17882911-17894999 <sup>b</sup> | 1111        | 2                            | 2                                  | 1                                | 83                        | 109 (C)   | 61                                     | +                                              | +                                      | No tblastn                   | No tblastn                | O368                        |
| GH03576                           | 3L:11054189-11056091              | 931         | 2                            | 6                                  | 5                                | 38                        | 81 (V)    | 50                                     | +                                              | -                                      | No tblastn                   | No tblastn                | O326                        |
| GH05108                           | 3R:12165756-12164679              | 1094        | 1                            | 2                                  | 1                                | 33                        | 83 (F)    | 62                                     | +                                              | -                                      | No tblastn                   | No tblastn                | O721                        |
| GH05710                           | 2R:6692288-6691103                | 1211        | 1                            | 1                                  | 1                                | 80                        | 163 (V)   | 59                                     | +                                              | +                                      | 0.3328                       | No tblastn                | O231                        |
| GH06385                           | 3L:17882887-17884453 <sup>b</sup> | 1190        | 2                            | 2                                  | 2                                | 71                        | 101 (A)   | 69                                     | +                                              | -                                      | No tblastn                   | No tblastn                | O380                        |
| GH08923                           | X:11174866-11172455               | 2462        | 1                            | 3                                  | 1                                | 44                        | 70 (F)    | 56                                     | +                                              | -                                      | No tblastn                   | No tblastn                | O1221                       |
| GH14469                           | 2L:20617275-20618592              | 695         | 4                            | 1                                  | 1                                | 40                        | 67 (Q)    | 42                                     | +                                              | -                                      | No tblastn                   | No tblastn                | O518                        |
| GH22170                           | 3R:4303330-4269856                | 743         | 2                            | 1                                  | 1                                | 36                        | 88 (D)    | 59                                     | +                                              | -                                      | No tblastn                   | No tblastn                | O438                        |
| GH25188                           | 2L:610799-610007                  | 827         | 1                            | 1                                  | 1                                | 87                        | 112 (A)   | 59                                     | +                                              | -                                      | Failed [f]                   | Failed [f]                | O638                        |
| GH25505                           | 3R:5818318-5821108                | 2811        | 1                            | 6                                  | 5                                | 95                        | 104 (L)   | 57                                     | +                                              | -                                      | No tblastn                   | No tblastn                | O2670                       |
| GH26692                           | 3R:12272326-12270742              | 1674        | 1                            | 1                                  | 1                                | 64                        | 74 (R)    | 46                                     | +                                              | -                                      | No tblastn                   | No tblastn                | O1030                       |
| GH26828                           | X:1206514-1208830                 | 2335        | 1                            | 3                                  | 1                                | 66                        | 147 (P)   | 51                                     | +                                              | -                                      | No tblastn                   | No tblastn                | O34 O1801                   |
| GH27201                           | 2L:5154214-5150836                | 4554        | 1                            | 7                                  | 7                                | 84                        | 152 (S)   | 88                                     | +                                              | -                                      | No tblastn                   | No tblastn                | O3629                       |
| GM01028                           | 4:487255-488436                   | 1157        | 2                            | 1                                  | 1                                | 70                        | 71 (K)    | 47                                     | -                                              | -                                      | 0.1056                       | No tblastn                | No nt align                 |
| GM01206                           | X:3867475-3868711 <sup>b</sup>    | 1214        | 2                            | 6                                  | 3                                | 39                        | 50 (S)    | 49                                     | +                                              | -                                      | No tblastn                   | No tblastn                | O466                        |
| GM02923                           | 2R:9126179-9125168                | 1035        | 1                            | 1                                  | 1                                | 44                        | 91 (V)    | 46                                     | +                                              | -                                      | No tblastn                   | No tblastn                | Q77 O786                    |
| GM03003                           | X:3867701-3869573 <sup>b</sup>    | 1884        | 1                            | 6                                  | 3                                | 39                        | 57 (N)    | 56                                     | +                                              | -                                      | No tblastn                   | No tblastn                | O759                        |
| GM03661                           | X:10535429-10534282               | 1159        | 1                            | 1                                  | 1                                | 78                        | 80 (F)    | 40                                     | +                                              | -                                      | No tblastn                   | No tblastn                | O514                        |
| GM03914                           | 3L:4571847-4570833                | 1046        | 1                            | 1                                  | 1                                | 72                        | 76 (I)    | 59                                     | +                                              | -                                      | No tblastn                   | No tblastn                | O972                        |
| GM04921                           | X:7705291-7704128                 | 1159        | 1                            | 1                                  | 1                                | 83                        | 93 (L)    | 39                                     | +                                              | -                                      | No tblastn                   | No tblastn                | O488                        |
| GM07040                           | 3R:19686405-19682860              | 3544        | 1                            | 2                                  | 2                                | 86                        | 109 (K)   | 67                                     | +                                              | +                                      | No tblastn                   | No tblastn                | O705                        |
| GM07077                           | 2L:20422321-20423687              | 1385        | 1                            | 2                                  | 1                                | 67                        | 67 (L)    | 57                                     | +                                              | -                                      | No tblastn                   | No tblastn                | O766                        |
| GM07658                           | 3R:7594207-7592110                | 2095        | 1                            | 2                                  | 1                                | 76                        | 88 (F)    | 56                                     | +                                              | -                                      | No tblastn                   | No tblastn                | O1078                       |
| GM07660                           | X:16185157-16185994               | 853         | 1                            | 1                                  | 1                                | 19                        | 62 (I)    | 27                                     | +                                              | -                                      | No tblastn                   | No tblastn                | O841                        |
| GM07702                           | 2L:12532047-12533217              | 850         | 2                            | 1                                  | 1                                | 72                        | 95 (K)    | 42                                     | +                                              | -                                      | No tblastn                   | No tblastn                | O574                        |
| GM09444                           | X:10533220-10532579               | 653         | 1                            | 1                                  | 1                                | 36                        | 73 (F)    | 26                                     | +                                              | -                                      | No tblastn                   | No tblastn                | O570                        |
| GM09534                           | X:16293581-16292695               | 912         | 1                            | 1                                  | 1                                | 71                        | 106 (N)   | 44                                     | +                                              | -                                      | No tblastn                   | No tblastn                | O446                        |
| GM09668                           | 2L:4870261-4869463                | 834         | 1                            | 1                                  | 1                                | 24                        | 52 (Q)    | 33                                     | +                                              | -                                      | No tblastn                   | No tblastn                | O716                        |
| GM10787                           | 3R:3021116-3012764                | 1695        | 1                            | 25                                 | 24                               | 94                        | 136 (F)   | 60                                     | +                                              | +                                      | No tblastn                   | No tblastn                | O1470                       |
| GM12657                           | 3L:3415885-3417390                | 708         | 2                            | 1                                  | 1                                | 66                        | 90 (S)    | 53                                     | -                                              | -                                      | No tblastn                   | No tblastn                | No nt align                 |
| GM24362                           | 3L:8022988-8029926                | 450         | 2                            | 1                                  | 1                                | 55                        | 95 (L)    | 49                                     | -                                              | +                                      | No tblastn                   | No tblastn                | No nt align                 |
| HL05775                           | X:4103626-4105491                 | 1890        | 1                            | 5                                  | 5                                | 85                        | 97 (F)    | 47                                     | +                                              | -                                      | Failed [f]                   | No tblastn                | O1118                       |
| LD11130                           | X:11174437-11173269               | 1187        | 1                            | 2                                  | 1                                | 44                        | 70 (F)    | 44                                     | +                                              | -                                      | No tblastn                   | No tblastn                | O902                        |
| LD11162                           | 3R:9638860-9640391                | 1549        | 1                            | 13                                 | 11                               | 49                        | 163 (V)   | 64                                     | +                                              | -                                      | 0.1156                       | 0.1393                    | O1040                       |
| LD13184                           | 3L:13985612-13983409              | 2222        | 1                            | 4                                  | 2                                | 88                        | 132 (T)   | 84                                     | +                                              | +                                      | No tblastn                   | No tblastn                | O992                        |
| LD16711                           | 3R:14119833-14118160              | 1672        | 1                            | 1                                  | 1                                | 76                        | 103 (K)   | 55                                     | -                                              | -                                      | No tblastn                   | No tblastn                | No nt align                 |
| LD23922                           | X:2619531-2658305                 | 1721        | 6                            | 1                                  | 1                                | 82                        | 96 (Y)    | 69                                     | +                                              | -                                      | No tblastn                   | No tblastn                | O163                        |
| LD28571                           | 2R:19805458-19802173              | 3302        | 1                            | 1                                  | 1                                | 96                        | 128 (V)   | 107                                    | +                                              | -                                      | No tblastn                   | No tblastn                | P189 O2070                  |
| LD30889                           | X:4137084-4136053                 | 1069        | 1                            | 1                                  | 1                                | 49                        | 76 (T)    | 63                                     | +                                              | -                                      | No tblastn                   | No tblastn                | O351                        |
| LD38553                           | 2R:10858584-10915445              | 1317        | 2                            | 16                                 | 14                               | 42                        | 110 (S)   | 68                                     | +                                              | +                                      | No tblastn                   | No tblastn                | O302                        |
| LP01161                           | 3L:3754356-3754868                | 527         | 1                            | 1                                  | 1                                | 56                        | 68 (Q)    | 43                                     | +                                              | -                                      | No tblastn                   | No tblastn                | O308                        |
| LP03188                           | 3R:2525887-2525275                | 553         | 2                            | 1                                  | 1                                | 59                        | 68 (I)    | 45                                     | +                                              | -                                      | No tblastn                   | No tblastn                | O475                        |
| LP06491                           | 2L:14334311-14334773              | 403         | 2                            | 1                                  | 1                                | 67                        | 67 (M)    | 29                                     | -                                              | -                                      | No tblastn                   | No tblastn                | O165                        |
| LP11739                           | 3R:8981405-8985151                | 1222        | 3                            | 4                                  | 4                                | 35                        | 90 (N)    | 59                                     | +                                              | -                                      | No tblastn                   | No tblastn                | O999                        |
| LP12023                           | 3L:7365852-7366148                | 313         | 1                            | 1                                  | 1                                | 59                        | 59 (L)    | 36                                     | -                                              | -                                      | No tblastn                   | No tblastn                | No nt align                 |
| RE21847                           | 3R:5608431-5605255                | 3191        | 1                            | 5                                  | 5                                | 93                        | 149 (L)   | 114                                    | +                                              | -                                      | No tblastn                   | No tblastn                | P108 O1680                  |
| RE28911                           | 2L:16816677-16819971              | 1005        | 5                            | 9                                  | 8                                | 44                        | 64 (A)    | 53                                     | +                                              | -                                      | No tblastn                   | No tblastn                | O856                        |
| RE45760                           | 3R:21500275-21501180              | 758         | 2                            | 2                                  | 1                                | 35                        | 97 (K)    | 44                                     | +                                              | -                                      | 0.1682                       | 0.1284                    | P333 O159                   |
| RE54004                           | X:18905856-18902037               | 562         | 2                            | 1                                  | 1                                | 26                        | 44 (S)    | 38                                     | +                                              | -                                      | No tblastn                   | No tblastn                | O406                        |
| RE63504                           | 2R:19947503-19946983              | 331         | 3                            | 77                                 | 77                               | 38                        | 38 (F)    | 40                                     | +                                              | -                                      | No tblastn                   | No tblastn                | O96                         |
| RE65113                           | 3R:5354074-5355417                | 1062        | 2                            | 9                                  | 3                                | 67                        | 67 (D)    | 45                                     | +                                              | -                                      | No tblastn                   | No tblastn                | O603                        |
| RE66017                           | 3R:18597843-18593937              | 3461        | 2                            | 2                                  | 1                                | 69                        | 102 (S)   | 57                                     | +                                              | -                                      | No tblastn                   | No tblastn                | O821                        |
| RH09485                           | 2R:13775111-13775672              | 518         | 2                            | 3                                  | 1                                | 40                        | 74 (V)    | 51                                     | -                                              | -                                      | No tblastn                   | No tblastn                | No nt align                 |
| RH45340                           | X:10201001-10201550               | 407         | 3                            | 4                                  | 1                                | 48                        | 98 (T)    | 50                                     | +                                              | +                                      | 0.0488                       | No tblastn                | P16 O129                    |
| RH57193                           | 3L:19437267-19435625              | 981         | 4                            | 6                                  | 6                                | 33                        | 101 (L)   | 65                                     | +                                              | -                                      | 0.2853                       | No tblastn                | O684                        |
| RH62702                           | X:17891905-17889857               | 2049        | 1                            | 1                                  | 1                                | 95                        | 114 (F)   | 52                                     | +                                              | -                                      | No tblastn                   | No tblastn                | O825                        |
| RH62830                           | 3L:6180107-6180481                | 326         | 2                            | 1                                  | 1                                | 40                        | 56 (V)    | 35                                     | +                                              | +                                      | 0.1831                       | 0.0527                    | O259                        |
| RH63361                           | 3R:22240192-22239779              | 424         | 1                            | 1                                  | 1                                | 62                        | 66 (G)    | 40                                     | +                                              | +                                      | Failed [f]                   | Failed [f]                | Q72                         |
| SD03144                           | 2L:11767980-11764057              | 3956        | 1                            | 1                                  | 1                                | 81                        | 100 (V)   | 60                                     | +                                              | -                                      | No tblastn                   | No tblastn                | Q21 O2750                   |
| SD04448                           | 2L:20718271-20720685              | 2301        | 2                            | 3                                  | 1                                | 71                        | 84 (L)    | 58                                     | +                                              | -                                      | No tblastn                   | No tblastn                | O1618                       |
| SD05379                           | X:16070095-16071476               | 1391        | 1                            | 1                                  | 1                                | 83                        | 83 (Q)    | 49                                     | +                                              | -                                      | No tblastn                   | No tblastn                | O197                        |
| SD10988                           | 3R:27583061-27584522              | 1415        | 2                            | 2                                  | 2                                | 80                        | 96 (R)    | 75                                     | +                                              | +                                      | No tblastn                   | No tblastn                | O1182                       |
| SD25037                           | 2R:13839131-13840886              | 1560        | 2                            | 2                                  | 1                                | 90                        | 205 (V)   | 56                                     | +                                              | -                                      | error                        | Failed [f]                | O1138                       |
| CR31400 (Hsr [I])                 | 3R:17122362-17127386              | 5025        | 1                            | 26                                 | 24                               | 76                        | 123 (S)   | 72                                     | +                                              | -                                      | No tblastn                   | No tblastn                | O2088                       |
| CR32777 (roX1)                    | X:3599512-3603303                 | 3748        | 1                            | 81                                 | 73                               | 84                        | 134 (V)   | 62                                     | +                                              | -                                      | No tblastn                   | No tblastn                | No nt align                 |
| CR32665 (roX2)                    | X:11320995-11322374               | 1285        | 1                            | 2                                  | 2                                | 45                        | 79 (N)    | 45                                     | +                                              | -                                      | No tblastn                   | No tblastn                | O440                        |
| CG11296 (pcg)                     | 2R:17373704-17376371              | 1197        | 2                            | 9                                  | 8                                | 112                       | 113 (T)   | 65                                     | +                                              | +                                      | 0.2857                       | 0.1677                    | No nt align                 |

Curated candidate noncoding transcripts are listed alphanumerically. Horizontal lines separate clones from specific BDGP cDNA libraries indicated by clone identifiers.

<sup>a</sup> cDNA identifiers for *pncr* gene transcripts are italicized.

<sup>b</sup> Two pairs of cDNAs have overlapping genomic coordinates: AT31442 and GH06385; GM01206 and GM03003.

<sup>c</sup> Exons predicted by automated genome alignment and subsequent manual inspection.

<sup>d</sup> Number of ESTs overlapping any portion of transcript; total includes cDNA itself.

<sup>e</sup> Number of ESTs overlapping 5' end of transcript; total includes cDNA itself.

<sup>f</sup> Longest translation using methionine as an initiation codon.

<sup>g</sup> Longest translation using any initiating codon.

<sup>h</sup> Longest translation for randomized transcript sequence using met initiation codon (average translation length from six randomizations).

<sup>i</sup> '+' denotes BLASTN hsp with expectation score < 1e-5.

<sup>j</sup> Transcript ORF is more conserved than transcript UTRs, as measured by BLASTN against *D. pseudoobscura*.

<sup>k</sup> Values <0.5 signify conservation of codon structure; sequences that fail chi-square data fitness test or fail to produce a protein alignment are noted.

<sup>l</sup> Non-parametric Ka/Ks value, possible codeml failure.

<sup>m</sup> As in (k), with *D. virilis* used as comparative genome.

<sup>n</sup> P: protein-coding, O: known non-coding, O: Other. Number of nt for each; sequences that fail to yield a comparative nucleotide alignment are noted.
