# Supplementary material
Source: PubMed Central journal article supplement (PMC1082852)
Supplement: pnas_102_15_5495__10.pdf [file pnas_102_15_5495__10.pdf]

Table 4 Summary of experimental analyses of candidate noncoding transcripts

| BDGP cDNA identifier <sup>a,b</sup> | Predicted exon number | Individual introns verified by RT-PCR | Curated transcript detected by end-to-end RT-PCR <sup>f</sup> | Lengths of transcripts detected on Northern blot <sup>g</sup> | Embryo <i>in situ</i> hybridization analysis | Affymetrix microarray <sup>k</sup> |
|-------------------------------------|-----------------------|---------------------------------------|---------------------------------------------------------------|---------------------------------------------------------------|----------------------------------------------|------------------------------------|
| <i>GM01028 (pncr013:4)</i>          | 2                     | 1 of 1                                | Yes                                                           | 0.7; 1.1; 2.3; 4 kb <sup>h</sup>                              | Maternal                                     | +                                  |
| <i>LD11162 (pncr001:3R)</i>         | 1                     |                                       |                                                               | 1.5                                                           | Zygotic                                      | +                                  |
| <i>RE28911 (pncr003:2L)</i>         | 5                     | 4 of 4                                | Yes                                                           | 1                                                             | Zygotic                                      | +                                  |
| <i>RH45340 (pncr006:X)</i>          | 3                     | 2 of 2                                | Yes                                                           | 0.4                                                           | Maternal, zygotic                            | +                                  |
| <i>RH57193 (pncr009:3L)</i>         | 4                     | 2 of 3                                | No                                                            | 1                                                             | Maternal, zygotic                            | +                                  |
| <i>AT24650 (pncr010:3L)</i>         | 3                     | 2 of 2                                | Yes <sup>i</sup>                                              | 0.6 <sup>i</sup>                                              | Not detected                                 | +                                  |
| <i>GH03576 (pncr011:3L)</i>         | 2                     | 1 of 1                                | Yes                                                           | 0.9                                                           | Not detected                                 | +                                  |
| <i>GH14469 (pncr012:2L)</i>         | 4                     | 3 of 3                                | Yes                                                           | 0.7; 1.1 <sup>h</sup>                                         | Not detected                                 | +                                  |
| <i>LD13184 (pncr014:3L)</i>         | 1                     |                                       |                                                               | 2.2 <sup>i</sup>                                              | Not detected                                 | +                                  |
| <i>LP03188 (pncr002:3R)</i>         | 2                     | 1 of 1                                | Yes                                                           | 0.6 <sup>i</sup>                                              | Not detected                                 | +                                  |
| <i>LP12023 (pncr015:3L)</i>         | 1                     |                                       |                                                               | 0.3 <sup>i</sup>                                              | Not detected                                 | +                                  |
| <i>RE54004 (pncr004:X)</i>          | 2                     | 1 of 1                                | Yes                                                           | 0.6                                                           | Not detected                                 | +                                  |
| <i>RE63504 (pncr005:2R)</i>         | 3                     | 2 of 2                                | Yes                                                           | 0.3                                                           | Not detected                                 | +                                  |
| <i>RH09485 (pncr016:2R)</i>         | 2                     | 1 of 1                                | Yes                                                           | 0.5                                                           | Not detected                                 | +                                  |
| <i>RH62830 (pncr008:3L)</i>         | 2                     | 1 of 1                                | Yes                                                           | 0.3                                                           | Not detected                                 | +                                  |
| <i>RH63361 (pncr007:3R)</i>         | 1                     |                                       |                                                               | 0.4                                                           | Not detected                                 | +                                  |
| <i>SD10988 (pncr017:3R)</i>         | 2                     | 1 of 1                                | Yes                                                           | 1.4                                                           | Not detected                                 | +                                  |
| <i>AT21289</i>                      | 1                     |                                       |                                                               | Not detected                                                  | Zygotic, subnuclear                          | +                                  |
| <i>GH22170</i>                      | 2                     | 1 of 1                                | Yes                                                           | Not detected                                                  | Zygotic, subnuclear                          | +                                  |
| <i>GM07040</i>                      | 1                     |                                       |                                                               | Not detected                                                  | Zygotic, subnuclear                          | +                                  |
| <i>AT27057</i>                      | 1                     |                                       |                                                               | 1.7                                                           | Maternal, zygotic                            | +                                  |
| <i>GM02923</i>                      | 1                     |                                       |                                                               | 9                                                             | Maternal, zygotic                            | +                                  |
| <i>GM03003</i>                      | 1                     |                                       |                                                               | 6; 9.5                                                        | Maternal, zygotic                            | +                                  |
| <i>GM03914</i>                      | 1                     |                                       |                                                               | 5                                                             | Maternal, zygotic                            | +                                  |
| <i>GM07077</i>                      | 1                     |                                       |                                                               | 4; doublet -9                                                 | Maternal, zygotic                            | +                                  |
| <i>GM07658</i>                      | 1                     |                                       |                                                               | 6                                                             | Zygotic                                      | +                                  |
| <i>GM09444</i>                      | 1                     |                                       |                                                               | >10                                                           | Zygotic                                      | +                                  |
| <i>GM09534</i>                      | 1                     |                                       |                                                               | 8 <sup>i</sup>                                                | Zygotic                                      | +                                  |
| <i>GM10787</i>                      | 1                     |                                       |                                                               | Multiple transcripts <sup>i</sup>                             | Zygotic                                      | +                                  |
| <i>LP11739</i>                      | 3                     | 2 of 2                                | Yes                                                           | 8 <sup>i</sup>                                                | Zygotic, subnuclear                          | +                                  |
| <i>RE65113</i>                      | 2                     | 1 of 1                                | Yes                                                           | 4                                                             | Zygotic                                      | +                                  |
| <i>RH62702</i>                      | 1                     |                                       |                                                               | >10                                                           | Zygotic                                      | +                                  |
| <i>SD04448</i>                      | 2                     | 1 of 1                                | Yes                                                           | 6.5                                                           | Zygotic                                      | +                                  |
| <i>GH05108</i>                      | 1                     |                                       |                                                               | 1.8; 2.8                                                      | Not detected                                 | +                                  |
| <i>GH08923</i>                      | 1                     |                                       |                                                               | 5; 6                                                          | Not detected                                 | +                                  |
| <i>GH25505</i>                      | 1                     |                                       |                                                               | 10                                                            | Not detected                                 | +                                  |
| <i>GH26692</i>                      | 1                     |                                       |                                                               | 5; 6                                                          | Not detected                                 | +                                  |
| <i>GM01206</i>                      | 2                     | 0 of 1 <sup>d</sup>                   | No                                                            | 6; 9                                                          | Not detected                                 | +                                  |
| <i>GM03661</i>                      | 1                     |                                       |                                                               | 10                                                            | Not detected                                 | +                                  |
| <i>GM07660</i>                      | 1                     |                                       |                                                               | 4                                                             | Not detected                                 | +                                  |
| <i>GM09668</i>                      | 1                     |                                       |                                                               | 3.8                                                           | Not detected                                 | +                                  |
| <i>GM24362</i>                      | 2                     | 1 of 1                                | Yes                                                           | 6; 8                                                          | Not detected                                 | +                                  |
| <i>HL05775</i>                      | 1                     |                                       |                                                               | 7; 9                                                          | Not detected                                 | +                                  |
| <i>LD11130</i>                      | 1                     |                                       |                                                               | 5, 5.5, 6                                                     | Not detected                                 | +                                  |
| <i>LP06491</i>                      | 2                     | 1 of 1 <sup>c</sup>                   | No                                                            | 0.6                                                           | Not detected                                 | +                                  |
| <i>RE21847</i>                      | 1                     |                                       |                                                               | 5                                                             | Not detected                                 | +                                  |
| <i>RE45760</i>                      | 2                     | 1 of 1                                | Yes                                                           | 1.4                                                           | Not detected                                 | -                                  |
| <i>SD05379</i>                      | 1                     |                                       |                                                               | 4.5                                                           | Not detected                                 | +                                  |
| <i>AT11392</i>                      | 3                     | 1 of 2                                | No                                                            | Not detected                                                  | Not detected                                 | -                                  |
| <i>AT31442</i>                      | 2                     | 1 of 1                                | Yes                                                           | Not detected                                                  | Not detected                                 | +                                  |
| <i>GH06385</i>                      | 2                     | 1 of 1                                | Yes                                                           | Not detected                                                  | Not detected                                 | +                                  |
| <i>LD23922</i>                      | 6                     | 4 of 5                                | No                                                            | Not detected                                                  | Not detected                                 | +                                  |
| <i>LD38553</i>                      | 2                     | 1 of 1                                | Yes                                                           | Not detected                                                  | Not detected                                 | +                                  |
| <i>RE66017</i>                      | 2                     | 1 of 1 <sup>e</sup>                   | No                                                            | Not detected                                                  | Not detected                                 | +                                  |
| <i>AT08427</i>                      | 1                     |                                       |                                                               | Not detected                                                  | Not detected                                 | +                                  |
| <i>AT13310</i>                      | 1                     |                                       |                                                               | Not detected                                                  | Not detected                                 | +                                  |
| <i>AT14266</i>                      | 1                     |                                       |                                                               | Not detected                                                  | Not detected                                 | -                                  |
| <i>AT22150</i>                      | 2                     | 0 of 1                                | No                                                            | Not detected                                                  | Not detected                                 | +                                  |
| <i>AT28783</i>                      | 1                     |                                       |                                                               | Not detected                                                  | Not detected                                 | +                                  |
| <i>GH05710</i>                      | 1                     |                                       |                                                               | Not detected                                                  | Not detected                                 | +                                  |
| <i>GH25188</i>                      | 1                     |                                       |                                                               | Not detected                                                  | Not detected                                 | +                                  |
| <i>GH26828</i>                      | 1                     |                                       |                                                               | Not detected                                                  | Not detected                                 | +                                  |
| <i>GH27201</i>                      | 1                     |                                       |                                                               | Not detected                                                  | Not detected                                 | +                                  |
| <i>GM04921</i>                      | 1                     |                                       |                                                               | Not detected                                                  | Not detected                                 | +                                  |
| <i>GM07702</i>                      | 2                     | 0 of 1                                | No                                                            | Not detected                                                  | Not detected                                 | -                                  |
| <i>GM12657</i>                      | 2                     | 0 of 1                                | No                                                            | Not detected                                                  | Not detected                                 | +                                  |
| <i>LD16711</i>                      | 1                     |                                       |                                                               | Not detected                                                  | Not detected                                 | +                                  |
| <i>LD28571</i>                      | 1                     |                                       |                                                               | Not detected                                                  | Not detected                                 | +                                  |
| <i>LD30889</i>                      | 1                     |                                       |                                                               | Not detected                                                  | Not detected                                 | +                                  |
| <i>LP01161</i>                      | 1                     |                                       |                                                               | Not detected                                                  | Not detected                                 | +                                  |
| <i>SD03144</i>                      | 1                     |                                       |                                                               | Not detected                                                  | Not detected                                 | -                                  |
| <i>SD25037</i>                      | 2                     | 0 of 1                                | No                                                            | Not detected                                                  | Not detected                                 | -                                  |

<sup>a</sup> Candidates are grouped by experimental results: positive Northern and *in situ*; positive Northern and negative *in situ*; negative Northern and subnuclear *in situ* signal; positive Northern with transcript longer than cDNA and positive *in situ*; positive Northern with transcript longer than cDNA and negative *in situ*; positive RT-PCR only and negative Northern and *in situ*; no expression detected by RT-PCR, *in situ* or Northern.

<sup>b</sup> cDNA identifiers corresponding to *pncr* genes are italicized and gene names given in parentheses.

<sup>c</sup> Apparent splice site of RT-PCR product differs with curated cDNA.

<sup>d</sup> Splicing could not be verified by a RT-PCR experiment because intron the predicted by the GM01206 cDNA is not spliced in the overlapping transcript corresponding to the GM03003 cDNA.

<sup>e</sup> RT-PCR product appears to contain a splice junction not represented by curated cDNA.

<sup>f</sup> RT-PCR was primed by oligonucleotides corresponding to the 5'- and 3'-most predicted exons.

<sup>g</sup> Not detected: no discrete band was observed under conditions sufficient to detect positive control transcripts.

<sup>h</sup> Additional (longer) transcript species are detected.

<sup>i</sup> Transcript is not detected in embryo samples by Northern analysis, noted for purpose of comparison with *in situ* result.

<sup>j</sup> Complex profile of transcripts with mobilities ranging from 1.5 to >10 kb.

<sup>k</sup> +: Expression above background. -: Transcript not expressed above background.
