# Supplementary material
Source: PubMed Central journal article supplement (PMC1082852)
Supplement: pnas_102_15_5495__11.pdf [file pnas_102_15_5495__11.pdf]

*D. mel.* AGTTGAGC CAAAGGTTTACCAGTTAATAGCAATAAAATGTGT TTTCCCCA ---GGAATAAA ---AAACCA ---AGAAATTAA ---HCAAGATGAGCGAAGCCCGAA TTGTT  
*D. pse.* AGTTGAGTAAAAGTCTTTACCAGTTAATAGCAAGAAATGTGTTCCTCCCAAAAAGCAATCAAAGGTAACACAGGAGCAAACTCAAGTGATGTGCGACCGGTAAACAGAAATTCGAAATCAATATGAGCGAAGCAAGAACTCATG  
*D. vir.*

*D. pse.* 5'

*D. mel.* ACCAACCTTTGGCATCC TGGCCATCC TGGTTTTCCTGTAUCCTCATATG CCGTATTGAAAATGTTCCGGCAAGTAGATGGT CTTAGGGCAGGA ---CCAARGC ---AGCAG  
*D. pse.* ACCAACCTTTGGCATCC TGGCCCTTCCTGTTTCTGCGCTGTAUCCTCATATG CAGTATTGTAGATG CAG -GGCCACTAGGAGGCTCTT TGAAGCAGGAGCCAAAATTTAAGCTTAATTAAATTCGATTAATTTCCATTTGTAATCATTAGCAA  
*D. vir.*

*D. pse.* 3'

*D. mel.* CCAA ---ATCGAATCAATCAAAATGAATGAGGCAAAAAGTTTGTTCACCACCTTCCCTGATCGTGGCCCTCTGTGTCTGTATGCGCTTTA GAAGCCGCTCTAGGCCACAGCCCTCAAGTCA CCGATGACCAT  
*D. pse.* CCAA AAAAAAACA CAACCACTCAAAAATGAATGAAAGCCAGAAGTTTGTTCACCACCTCCCTGATCTCCGGCTCTTGTGTTTGTGTATGCGCTTTACGAAGCCGTTTCTTA ---ACAACCCA ---CCCATCAACCA  
*D. vir.*

*D. vir.* 5'

*D. mel.* ACCAAACCAACCCACCAACCAACCGATCAGGATAGCTTACATGTTGAATTTCAATCCAGCCGCGCCATGCCATCATCTTGTGGTCCGTTGGAGCTTC TAGGACCCTAGCGCTTAAGATGTTTAGCATTTAATGGATTTCTAGTAG  
*D. pse.* ATCAATCATCA ---ATCAATCAATCA ---AGGATAGCTTACATGTTGAATTTCAATCCAGCCN ---AATCATG ---AACAACTTGCGCCTAGGAGGAGTTTAGGACCTTAGCGCTTAAGATGTT -AGCATTTAATGGATTTCTAGTAG  
*D. vir.*

*D. mel.* TAACCTAAGCCAG ---ATGACCTCAATG CCAACCAAGTTGCCAAA ---TGAAAGGCTCGGG ---ATCAGGATG  
*D. pse.* TAACCTAAGCCAGGTGAGTCAATATAGTATTAACAAACTAAATCCCAATTGAGATGAGCTCAAAAGCCACAGGTGCCAAATGTAGGCCCGCGGATTAGTTAGCACAGTTCTTAGGGGGCTCGCGCTT CAGCATCAGCATA  
*D. vir.*

*D. vir.* 3'

*D. mel.* GCATCTTGAT ---GGTAACCCCTG CCAATG ---GTGCTTGCACATTTTCATCTTTGAGCGGTGCAGGATCGATTTATTTGAAATAATGTGTGC CGCCCTTGGCGTCATCTGCTCTAATCATAAATATAGTTTGTGATC  
*D. pse.* TCGTTCCGGTGATGATGATGATGATCACTGAAAGGGCTCGCCTAGATTTGTCCATCTTCGCGCGGTGAAAGTCGATTCCTCAAGGCT ---CTGTGGCCACCGGTCATCTGCTCTAATCATAAATTTAATTTATGAT  
*D. vir.*

*D. mel.* TTTTATTATTATTGTTTGGTAATGAAACTACCTAGTTTGCAATCTAGACCATGATGTAAGTA ---TAAGCAAAATTAAGAAACA ---ATCA ---GTAAT ---CAATCTGACCACCGGATATAATTTCATTTGTTAAACAGCC  
*D. pse.* TCTTTT ---GTTTTCTTTTGAATGAAATGACTTAATTTGCAATTTATAGACCATGATGACAGAG ---AAAGAACAACAGCCACAGC ---ATCA ---ATAAGA ---CATTAAGAATTGGTTAATTTGTTTAAACAGCA  
*D. vir.*

*D. mel.* AGGTTTATTTCGCACCTCGTACATATTAAGACATGCATAATGTAACTGCATTTTACTGAGTTTTCTTAATAAATTTGTGAATAACAACCGCAAGAACH -GCAACAACA -AATTCAGGAAATAAAAACA AAAAACA AAAAACA  
*D. pse.* A -ATTTATTTTCGCATTTCGATTTAGTAAGACCTACATAATGTATAACTGCATTTTACTTTCATTTCTTAATAATTTATTGTGAATAACAAGCAAAATGCACATGCAA CAACAACA AAAAAGAA CAACAACA CAGCAACCTACTGCAGGA  
*D. vir.*

*D. mel.* AAAAA  
*D. pse.* ATAAAAAATAGAAAAAA  
*D. vir.* ACAAACAAGCAGGAATAAAA
